# Supplementary material for: Zinc attenuates ferroptosis and promotes functional recovery in contusion spinal cord injury by activating Nrf2/GPX4 defense pathway
Source: PubMed Central journal article supplement (PMC8339532; doi:10.1111/cns.13657), 2021-05-05

Full unedited blot for Figure 1A HO-1

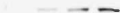

Full unedited blot for Figure 1A NRF-2

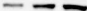

Full unedited blot for Figure 1A  $\beta$ -Actin

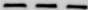

Full unedited blot for Figure 2B HO-1

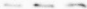

Full unedited blot for Figure 2B NRF-2

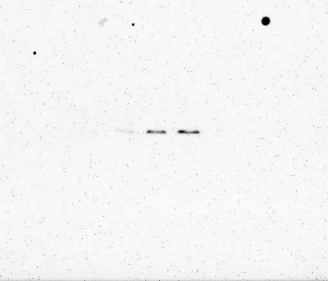

Full unedited blot for Figure 2B  $\beta$ -Actin

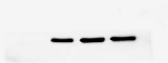

Full unedited blot for Figure 5A 4HNE

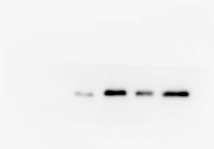

Full unedited blot for Figure 5A GPX4

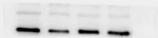



Full unedited blot for Figure 5A HO-1

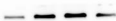

Full unedited blot for Figure 5A NRF-2

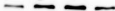

Full unedited blot for Figure 5A  $\beta$ -Actin

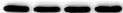

Full unedited blot for Figure 6A 4HNE

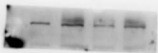

Full unedited blot for Figure 6A GPX4

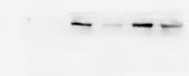

Full unedited blot for Figure 6A HO-1

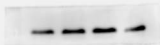

Full unedited blot for Figure 6A NRF2

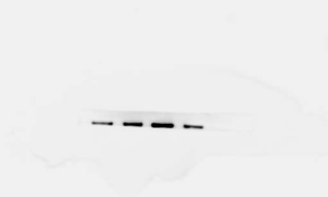

Full unedited blot for Figure 6A  $\beta$ -Actin

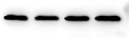



Full unedited blot for Figure 7A ICAM-1

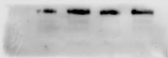

Full unedited blot for Figure 7A IL-1 $\beta$

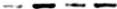

Full unedited blot for Figure 7A IL-6

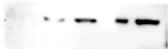

Full unedited blot for Figure 7A TNF- $\alpha$

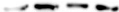

Full unedited blot for Figure 7A  $\beta$ -Actin

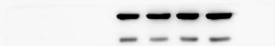

Full unedited blot for Figure 8A ICAM-1

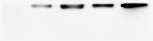

Full unedited blot for Figure 8A IL-1 $\beta$

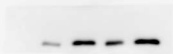

Full unedited blot for Figure 8A IL-6

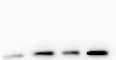



Full unedited blot for Figure 8A TNF- $\alpha$

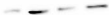

Full unedited blot for Figure 8A  $\beta$ -Actin

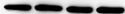

Supplement: CNS-27-1023-s002.pdf [file CNS-27-1023-s002.pdf]
